# Supplementary material
Source: MDPI journal article supplement (https://www.mdpi.com/2311-5637/9/1/18)
Supplement: s1 [file s1 › fermentation-2080958-supplementary.pdf]

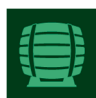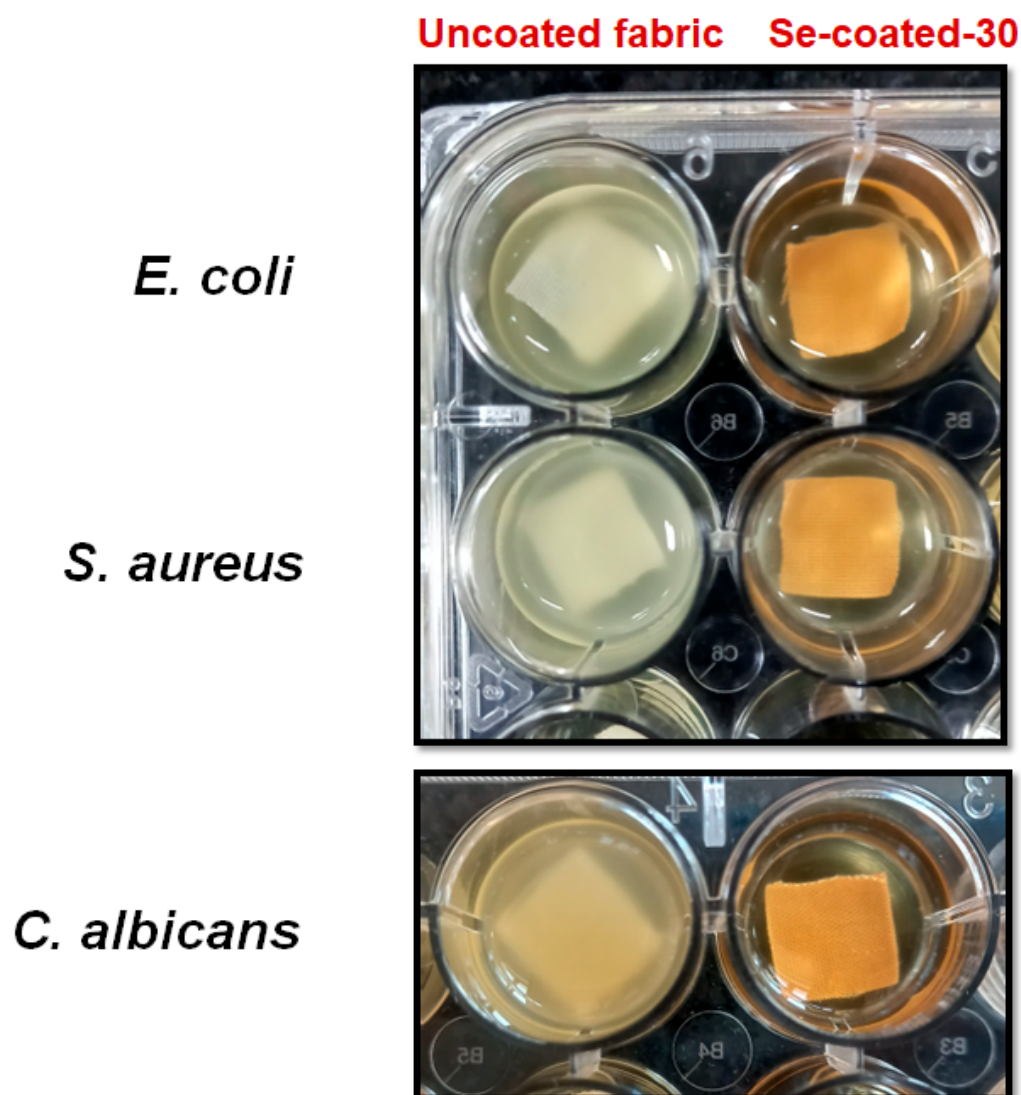

**Figure S1.** 24-well plate showing antibiofilm activity of uncoated fabric and Se-coated-30 against microbial strains.
